# Supplementary material
Source: PubMed Central journal article supplement (PMC7895310)
Supplement: NIHMS1667458-supplement-Supplementary_Table1.pdf [file NIHMS1667458-supplement-Supplementary_Table1.pdf]

**Supplementary Table 1. Results of correlational analyses in TD, 16p11.2 deletion, 16p11.2 deletion with articulation disorder, and 16p11.2 deletion without articulation disorder.**

| <b>White matter pathway</b> | <b>Behavioral test scores</b> | <b>r</b> | <b>p-value</b>       |
|-----------------------------|-------------------------------|----------|----------------------|
| <b>TD</b>                   |                               |          |                      |
| <b>MD Right Long AF</b>     | Language Memory (CELF-4)      | -0.902   | 0.014 <sup>a</sup>   |
| <b>AD Left UF</b>           | GCA (DAS-II)                  | -0.596   | 0.015 <sup>a</sup>   |
| <b>AD Left UF</b>           | SNC (DAS-II)                  | -0.525   | 0.037 <sup>a</sup>   |
| <b>AD Left UF</b>           | Verbal (DAS-II)               | -0.579   | 0.019 <sup>a</sup>   |
| <b>AD Right UF</b>          | GCA (DAS-II)                  | -0.526   | 0.037 <sup>a</sup>   |
| <b>AD Right UF</b>          | SNC (DAS-II)                  | -0.542   | 0.03 <sup>a</sup>    |
| <b>RD Right Anterior AF</b> | Expressive Language (CELF-4)  | -0.512   | 0.043 <sup>b</sup>   |
| <b>16p</b>                  |                               |          |                      |
| <b>Vol Left Long AF</b>     | GCA (DAS-II)                  | 0.470    | 0.049 <sup>a</sup>   |
| <b>Vol Left Long AF</b>     | SNC (DAS-II)                  | 0.578    | 0.009 <sup>a**</sup> |
| <b>Vol Left Long AF</b>     | Core Language (CELF-4)        | 0.475    | 0.046 <sup>b</sup>   |
| <b>Vol Right IFOF</b>       | Expressive Language (CELF-4)  | 0.527    | 0.036 <sup>a</sup>   |
| <b>Vol Right IFOF</b>       | Core Language (CELF-4)        | 0.504    | 0.033 <sup>b</sup>   |
| <b>Vol Right IFOF</b>       | GCA (DAS-II)                  | 0.491    | 0.038 <sup>a</sup>   |
| <b>Vol Right IFOF</b>       | SNC (DAS-II)                  | 0.447    | 0.048 <sup>b</sup>   |
| <b>AD Left Anterior AF</b>  | SNC (DAS-II)                  | -0.448   | 0.048 <sup>b</sup>   |

|                             |                             |        |                    |
|-----------------------------|-----------------------------|--------|--------------------|
| <b>RD Right Anterior AF</b> | GCA (DAS-II)                | -0.536 | 0.018 <sup>b</sup> |
| <b>RD Right Anterior AF</b> | SNC (DAS-II)                | -0.490 | 0.033 <sup>b</sup> |
| <b>RD Right Anterior AF</b> | Verbal (DAS-II)             | -0.463 | 0.046 <sup>b</sup> |
| <b>AD Left UF</b>           | Receptive Language (CELF-4) | -0.664 | 0.019 <sup>a</sup> |
| <b>AD Left UF</b>           | Language Memory (CELF-4)    | -0.574 | 0.040 <sup>b</sup> |
| <b>AD Right UF</b>          | Core Language (CELF-4)      | -0.526 | 0.03 <sup>a</sup>  |
| <b>AD Right UF</b>          | Receptive Language (CELF-4) | -0.618 | 0.032 <sup>a</sup> |
| <b>16p+AD</b>               |                             |        |                    |
| <b>Vol Left Long AF</b>     | SNC (DAS-II)                | 0.578  | 0.044 <sup>a</sup> |
| <b>AD Left UF</b>           | Receptive Language (CELF-4) | -0.682 | 0.03 <sup>a</sup>  |
| <b>AD Left UF</b>           | Core Language (CELF-4)      | -0.580 | 0.048 <sup>b</sup> |
| <b>AD Right UF</b>          | Core Language (CELF-4)      | -0.602 | 0.05 <sup>a</sup>  |
| <b>AD Right UF</b>          | Receptive Language (CELF-4) | -0.688 | 0.028 <sup>a</sup> |
| <b>AD Right UF</b>          | SNC (DAS-II)                | -0.612 | 0.035 <sup>a</sup> |
| <b>16p-AD</b>               |                             |        |                    |
| <b>Vol Left Long AF</b>     | GCA (DAS-II)                | 0.888  | 0.044 <sup>a</sup> |
| <b>Vol Left Long AF</b>     | Verbal (DAS-II)             | 0.860  | 0.028 <sup>b</sup> |
| <b>AD Left Anterior AF</b>  | SNC (DAS-II)                | -0.934 | 0.02 <sup>a</sup>  |

<sup>a</sup>Age and ICV are used as covariates.

<sup>b</sup>Age is used as a covariate.

\*\* Significant at  $p \leq 0.001$
